RESEARCH ARTICLE

# The Impact of Variable Degrees of Freedom and Scale Parameters in Bayesian Methods for Genomic Prediction in Chinese Simmental Beef Cattle

Bo Zhu<sup>1</sup>, Miao Zhu<sup>1</sup>, Jicai Jiang<sup>2</sup>, Hong Niu<sup>1</sup>, Yanhui Wang<sup>1</sup>, Yang Wu<sup>1</sup>, Lingyang Xu<sup>1</sup>, Yan Chen<sup>1</sup>, Lupei Zhang<sup>1</sup>, Xue Gao<sup>1</sup>, Huijiang Gao<sup>1</sup>, Jianfeng Liu<sup>2</sup>, Junya Li<sup>1\*</sup>

**1** Laboratory of Molecular Biology and Bovine Breeding, Institute of Animal Science, Chinese Academy of Agricultural Sciences, Beijing, China, **2** Department of Animal Genetics, Breeding and Reproduction, China Agricultural University, Beijing, China

\* [jl1@iascaas.net.cn](mailto:jl1@iascaas.net.cn)

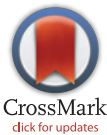

OPEN ACCESS

**Citation:** Zhu B, Zhu M, Jiang J, Niu H, Wang Y, Wu Y, et al. (2016) The Impact of Variable Degrees of Freedom and Scale Parameters in Bayesian Methods for Genomic Prediction in Chinese Simmental Beef Cattle. PLoS ONE 11(5): e0154118. doi:10.1371/journal.pone.0154118

**Editor:** Shuhong Zhao, Huazhong Agricultural University, CHINA

**Received:** October 11, 2015

**Accepted:** April 9, 2016

**Published:** May 3, 2016

**Copyright:** © 2016 Zhu et al. This is an open access article distributed under the terms of the [Creative Commons Attribution License](https://creativecommons.org/licenses/by/4.0/), which permits unrestricted use, distribution, and reproduction in any medium, provided the original author and source are credited.

**Data Availability Statement:** We confirm that all data underlying our findings are publicly available without restriction. Data is available from the Dryad Digital Repository: doi:10.5061/dryad.4qc06.

**Funding:** This study was supported by Cattle Breeding Innovative Research Team (cxgc-ias-03), the 12th "Five-Year" National Science and Technology Support Project (2011BAD28B04) Basic Research Fund Program, the National High Technology Research and Development Program of China (863 Program 2013AA102505-4), Chinese Academy of Agricultural Sciences Fundamental

## Abstract

Three conventional Bayesian approaches (BayesA, BayesB and BayesC $\pi$ ) have been demonstrated to be powerful in predicting genomic merit for complex traits in livestock. A priori, these Bayesian models assume that the non-zero SNP effects (marginally) follow a *t*-distribution depending on two fixed hyperparameters, degrees of freedom and scale parameters. In this study, we performed genomic prediction in Chinese Simmental beef cattle and treated degrees of freedom and scale parameters as unknown with inappropriate priors. Furthermore, we compared the modified methods (BayesFA, BayesFB and BayesFC $\pi$ ) with their corresponding counterparts using simulation datasets. We found that the modified methods with distribution assumed to the two hyperparameters were beneficial for improving the predictive accuracy. Our results showed that the predictive accuracies of the modified methods were slightly higher than those of their counterparts especially for traits with low heritability and a small number of QTLs. Moreover, cross-validation analysis for three traits, namely carcass weight, live weight and tenderloin weight, in 1136 Simmental beef cattle suggested that predictive accuracy of BayesFC $\pi$  noticeably outperformed BayesC $\pi$  with the highest increase (3.8%) for live weight using the cohort masking cross-validation.

## Introduction

Genomic prediction uses all available molecular markers as covariates in a linear regression model to estimate genomic breeding values for quantitative traits. This has aroused a strong interest on the explorations of genomic selection in animals and plants [1–5].

Currently, improving the accuracy of genomic breeding values has been recognized as a crucial step for genomic improvement. Various Bayesian linear regression methods have been proposed to improve the predictive accuracy in genomic selection such as BayesC [6], BayesC $\pi$

Research Budget Increment Projects (2013ZL031 and 2014ZL006), Chinese Academy of Agricultural Sciences Foundation (2014ywf-yb-4), Beijing Natural Science Foundation (6154032), and the National Natural Science Foundations of China (31472079, 31372294, and 31402039).

**Competing Interests:** The authors have declared that no competing interests exist.

and BayesD $\pi$  [7]. To denote these Bayesian methods, Gianola *et al.* coined the term “Bayesian alphabet” using the numbers of letters of the alphabet [8]. These methods are different in the adoption of priors while sharing the same sampling model: a Gaussian distribution with a mean vector represented by a regression on numbers of markers, typically SNPs, and a residual variance  $\sigma_e^2$ . Bayesian Lasso used another distribution (Laplace) as the marker effect prior assumption to predict genomic estimated breeding values (GEBVs) [9–11]. Other Bayesian approaches such as BayesRS (sharing of information across populations model) [12] and BayesTA, BayesTB, and BayesTC $\pi$  (threshold models) [13] were proposed to improve the accuracy of genomic prediction.

BayesA assumes all SNPs have effects, and each SNP has its own variance, while BayesB assume that the prior distribution of SNP effects are zero with probability  $\pi$ , and normally distributed with a zero mean and a locus-specific variance with probability  $(1 - \pi)$  [14]. BayesC $\pi$  treats  $\pi$  as an unknown parameter with a uniform (0, 1) prior distribution, and assumes all SNP effects have a common variance [7]. These methods assume the variances of SNP effects follow a scaled inverse chi-square prior distribution with degrees of freedom  $\nu$ , and a scale parameter  $S_a^2$ . A general consensus reveals that the full-conditional posterior distribution of a locus-specific variance adds only one to the degrees of freedom in BayesA as compared with its prior assumption, while in BayesC $\pi$  it increases the value by the number of markers that have effects in each iteration [8]. For BayesA, BayesB and BayesC $\pi$ , hyperparameter  $\nu$  is fixed (4.2 or 4), and  $S_a^2$  is usually derived from an assumed additive-genetic variance [15]. However, the two fixed hyperparameters may vary in different genetic architecture [8]. Many studies have proposed some alternative priors to estimate these two hyperparameters. For instance, Habier *et al.* proposed BayesD $\pi$  by extending the BayesB method and treating  $S_a$  as unknown with Gamma(1,1) [7]. Yi *et al.* developed a model to estimate two hyperparameters  $\nu$  and  $S_a^2$  by assigning a uniform density on  $1/\nu$  for the range (0,1] and a uniform distribution on  $S_a^2$  for the range (0,A] with A being a large number in the extent of BayesA [16]. Yang *et al.* applied a Gamma prior distribution on  $S_a^2$  with parameter  $\alpha_s = \beta_s = 0.1$ , and specified  $\nu \sim p(\nu) \propto (\nu+1)^{-2}$  for both BayesA and BayesB [17], and they further used three alternative Markov Chain Monte Carlo approaches based on Metropolis-Hastings to estimate these two hyperparameters [18]. To investigate the impact of variable degrees of freedom and scale parameters in Bayesian methods for genomic prediction in Chinese Simmental beef cattle, we treated  $\nu$  and  $S_a^2$  as unknown and gave inappropriate priors in our study. These modified methods were termed as BayesFA, BayesFB and BayesFC $\pi$ , respectively.

The objectives of this study were to: (1) investigate the impact of variable  $\nu$  and  $S_a^2$  on the predictive accuracy for live weight, carcass weight and tenderloin weight in Chinese Simmental beef cattle using three modified methods (BayesFA, BayesFB and BayesFC $\pi$ ); (2) explore relationships between these two hyperparameters and genetic architecture especially for the number of QTL in simulation study; (3) compare the predictive accuracies among these methods (GBLUP, BayesA, BayesB, BayesC $\pi$ , BayesFA, BayesFB and BayesFC $\pi$ ) using cross-validation scheme in Chinese Simmental beef cattle population.

## Materials and Methods

### Ethics statement

All animals were treated following the guidelines for the experimental animals established by the Council of China. Animal experiments were approved by the Science Research Department of the Institute of Animal Science, Chinese Academy of Agricultural Sciences (CAAS) (Beijing, China).

### Statistical Model

The general statistical model is as follow:

$$y = Xb + Za + e \tag{1}$$

Here,  $y$  is an  $N \times 1$  ( $N =$  number of observations) vector of phenotypes,  $X$  is an incidence matrix of fixed effects in  $b$ ,  $Z$  is an  $N \times P$  ( $P =$  number of SNPs) matrix of marker codes (genotypes were coded as 0, 1 or 2).  $a$  is an  $P \times 1$  vector of SNP effects.  $e$  is a vector of residuals. It is assumed that  $y$  is conditionally independent and distributed as

$$(y|b, a, \sigma_e^2) \sim N(Xb + Za, I\sigma_e^2) \tag{2}$$

### Prior specifications

The prior assumption for  $\alpha_j$  depends on the variance  $\sigma_j^2$  and the probability  $\pi$ . In BayesA and BayesFA, all SNPs have effects and their prior distributions were normal distribution with mean 0 and variance  $\sigma_j^2$ , and each SNP has a specific variance, i.e.,  $\sigma_j^2 \sim x^{-2}(\nu, \nu S_a^2)$ .  $\sigma_j^2$  denotes that SNP  $j$  has its own variance, and each of these variances has a scaled inverse chi-square distribution with the parameters of  $\nu$  and  $S_a^2$ . In BayesB and BayesFB, two-component mixture with one component being  $t(0, \nu, S_a^2)$  and the other component being a spike at 0 are provided, i.e.,

$$\alpha_j | \pi, \sigma_j^2 \sim (idd) \begin{cases} 0 & \text{with probability } \pi \\ N(0, \sigma_j^2) & \text{with probability } (1 - \pi) \end{cases}$$

where  $j = 1, \dots, q$

$$\sigma_j^2 | \nu, S_a^2 \sim (idd) \nu S_a^2 x_v^{-2} \quad \text{when } \sigma_j^2 > 0 \tag{3}$$

Here,  $\pi$  represents the proportion of SNPs with no associated genetic effects on the trait of interest. BayesC $\pi$  and BayesFC $\pi$  also assume only a small proportion of SNPs have effects with probability  $(1-\pi)$  and the variances of SNP effects  $\sigma_j^2 = \sigma_a^2$ , where  $\sigma_a^2$  is the common variance of all the SNP effects. In BayesA, BayesB and BayesC $\pi$ ,  $S_a^2$  is normally derived from the Eq (4),

$$S_a^2 = \frac{(\nu - 2) * E(\sigma_j^2)}{\nu} \tag{4}$$

where  $\nu$  is fixed value (4.2) [14].

In present study, two hyperparameters ( $\nu$  and  $S_a^2$ ) was further treated as unknown with inappropriate priors.  $\nu$  was treated with gamma (4, 1) distribution in BayesFB, and exponential (0.25) distribution in BayesFA and BayesFC $\pi$ .  $S_a^2$  was treated as unknown with the prior gamma (1, 1) distribution in these modified methods, which was under same assumption as in BayesD $\pi$  [7]. BayesFC $\pi$  treated  $\pi$  as unknown with uniform (0, 1).

### Inference of model hyperparameters

Markov Chain Monte Carlo algorithms were used in the modified methods (BayesFA, BayesFB and BayesFC $\pi$ ) to sample the parameters. The posterior distribution of SNP effects implemented in these modified methods were the same as those of BayesA, BayesB [14] and BayesC $\pi$ [7]. The posterior distributions of the variances of SNP effects in BayesA and BayesFA were scaled inverse chi-square distribution  $[\sigma_j^2 | \nu + 1, (\nu S_a^2 + \alpha_j^2) / (\nu + 1)]$ . BayesFB used

Metropolis Hastings algorithm to sample SNP effects and variances as in BayesB. And the posterior distribution of the variances of SNP effects in BayesCπ and BayesFCπ were inverse chi-square with degrees of freedom  $\nu + q$  and scale  $(\nu S_a^2 + \sum_{j=1}^q \alpha_j^2) / (\nu + q)$ , where  $q$  was the number of SNPs fitted with non-zero effect in current iteration.

Full conditional posterior distribution of  $\nu$  in BayesFA and BayesFCπ (5a), and BayesFB (5b) were articulated as follows:

$$\begin{aligned}
 f(\nu|ELSE) &\propto f(\sigma_j^2|S_a^2, \nu)f(\nu) \\
 &= \prod_{j=1}^q \frac{(\nu S_a^2/2)^{\nu/2} \exp(-\frac{\nu S_a^2}{2\sigma_j^2})}{\Gamma(\nu/2) * (\sigma_j^2)^{1+\nu/2}} \lambda * \exp(-\lambda\nu) \\
 &\propto (\nu/2)^{q\nu/2} [\Gamma(\nu/2)]^{-q} \exp(-\eta\nu) \\
 \eta &= \frac{1}{2} \sum_{j=1}^q \ln\left(\frac{\sigma_j^2}{S_a^2}\right) + \frac{1}{2} \sum_{j=1}^q \left(\frac{S_a^2}{\sigma_j^2}\right) + \lambda
 \end{aligned} \tag{5a}$$

$$\begin{aligned}
 f(\nu|ELSE) &\propto f(\sigma_j^2|S_a^2, \nu)f(\nu) \\
 &= \prod_{j=1}^q \frac{(\nu S_a^2/2)^{\nu/2} \exp(-\frac{\nu S_a^2}{2\sigma_j^2})}{\Gamma(\nu/2) * (\sigma_j^2)^{1+\nu/2}} * \nu^3 \exp(-\nu) \\
 &\propto \nu^3 (\nu/2)^{q\nu/2} [\Gamma(\nu/2)]^{-q} \exp(-\eta\nu) \\
 \eta &= \frac{1}{2} \sum_{j=1}^q \ln\left(\frac{\sigma_j^2}{S_a^2}\right) + \frac{1}{2} \sum_{j=1}^q \left(\frac{S_a^2}{\sigma_j^2}\right) + 1
 \end{aligned} \tag{5b}$$

In BayesFA,  $q$  was equal to the total number of SNPs ( $P$ ), while in BayesFCπ and BayesFB,  $q$  denotes the number of non-zero SNP effects in the current iteration.  $\lambda$  was set to 0.25. The posterior distribution of  $\nu$  in BayesFB (5b) was similar to BayesFCπ and BayesFA.

To sample  $\nu$  in our modified methods, we applied efficient accept-reject [19,20] sampling method. We supposed that  $f(x)$  was a target distribution function as a substitute for  $f(\nu|ELSE)$  (5a). A value  $c$  was sampled from a standard distribution function  $g(x)$ . The appropriate value for  $\nu$  was determined by the probability of acceptance  $f(c)/M * g(c)$ .  $M$  was the maximum value of a function  $f(x)/g(x)$ . Thus, the crucial step for sampling  $\nu$  was to obtain the maximum value  $M$ .

According to the accept-reject algorithm, the target distribution was as follows,

$$f(x; q, \eta) = (x/2)^{qx/2} [\Gamma(x/2)]^{-q} \exp(-\eta x) \tag{6}$$

$$\eta = \frac{1}{2} \sum_{j=1}^q \ln\left(\frac{\sigma_j^2}{S_a^2}\right) + \frac{1}{2} \sum_{j=1}^q \left(\frac{S_a^2}{\sigma_j^2}\right) + \lambda \geq \frac{1}{2} q + \lambda \tag{7}$$

And proposal distribution was

$$g(x; \theta) = \theta \exp(-\theta x) \tag{8}$$

Here  $\theta > 0$  is the parameter of the exponential distribution. A probability density function was constructed by taking the logarithm of  $f(x)/g(x)$ .

$$\begin{aligned}
 Q(x, \theta; q, \eta) &= \ln[f(x; q, \eta)]/g(x; \theta) \\
 &= (qx/2)\ln(x/2) - q\ln[\Gamma(x/2)] + (\theta - \eta)x - \ln(\theta)
 \end{aligned}
 \tag{9}$$

The first derivative of  $x$  and  $\theta$  was

$$\partial Q(x, \theta; q, \eta)/\partial x = (q/2)[\ln(x/2) + 1 - \psi(x/2)] + (\theta - \eta)
 \tag{10}$$

$$\partial Q(x, \theta; q, \eta)/\partial \theta = x - 1/\theta
 \tag{11}$$

Where  $\psi(x)$  was a Digamma function and  $\psi(x) = d\ln[\Gamma(x)]/dx$ .

The maximum  $M$  was calculated using Eqs (10) and (11) equal to zero. With  $\theta = 1/x$  obtained from the Eq (11), we defined  $h(x)$  using the substitution of  $\theta$  in Eq (10).

$$h(x) = \partial Q(x, \theta; q, \eta)/\partial x = (q/2)[\ln(x/2) + 1 - \psi(x/2)] + 1/x - \eta
 \tag{12}$$

Given that  $\ln(x/2) + 1 - \psi(x/2)$  was a decreasing function, we could find  $h(x)$  was a decreasing function. The range of function (12) was provided below.

$$\lim_{x \rightarrow 0} h(x) = +\infty
 \tag{13}$$

$$\lim_{x \rightarrow +\infty} h(x) = q/2 - \eta
 \tag{14}$$

In Eq (7),  $\eta \geq \frac{1}{2}q + \lambda$ , when  $x$  tended to positive infinity,  $h(x) \leq 0$  was obtained through Eq (14). A value that made  $h(x)$  equal to zero with the range less than zero to positive infinity should be existed. This value was assumed to be  $x^*$  that was used to obtain the maximum value  $M$ , hence the function  $Q(x, \theta; q, \eta)$  obtained the maximum value  $M$  with  $x$  being equal to  $x^*$ , and  $\theta$  was equal to  $1/x^*$ . To calculate  $x^*$ , we used the algorithm of exponential dichotomy [21].

Full conditional posterior distribution of  $S_a^2$  in BayesFA, BayesFB and BayesFC $\pi$  was built in the same way as for BayesD $\pi$ . BayesFC $\pi$  used the same full conditional posterior distribution of  $\pi$  (16) as in BayesC $\pi$ .

$$f(S_a^2|ELSE) \propto (S_a^2)^{qv/2} \exp\left(-\frac{vS_a^2}{2} \sum_{j=1}^q \frac{1}{\sigma_j^2}\right) \exp(-S_a^2)
 \tag{15}$$

$$(S_a^2|ELSE) \sim \text{Gamma}\left(\frac{1}{2}vq + 1, 1/\left(\frac{v}{2} \sum_{j=1}^q \frac{1}{\sigma_j^2} + 1\right)\right)$$

$$(\pi|ELSE) \sim \text{Beta}(P - q + 1, q + 1)
 \tag{16}$$

### Simulation study

Simulation population structure: All starting with a base population of 100 animals (50 males and 50 females), 2000 non-overlapping historical generations with the same population size denoted as generation -1999 to generation 0 were simulated. In the base population and each historical generation, 50 males randomly mated with 50 females, and each mating produced two offspring (1 male and 1 female). Six additional generations were simulated after the 2000 historical generations, which formed generation 1 to generation 6. The population size was expanded from 100 to 2000 in generation 1. The process involved 50 males and 50 females from generation 0 randomly mating, and 40 progenies (20 males and 20 females) were

produced by each mating pair. Then 50 males were randomly selected from the 500 males as the sires of the next generation, and different population sizes of females (250, 500, and 1000) were used as dams in generations 1–5. Finally, three population sizes (500, 1000 and 2000) from generations 2 to 6 were obtained by each male randomly mating 10 females, and each female produced two offspring. The simulation program was same to that of previous study [13].

**Genomic structure:** The frequently used mutation-drift equilibrium (MDE) model was applied to simulate whole-genome data. Five chromosomes were simulated, and each contained 1 Morgan with 2000 SNPs that were randomly located in the genome. There was a potential quantitative trait locus (QTL) between two SNPs, so 10000 SNPs produced 9995 potential QTL in total. The true QTL effects, just as the allele substitution effects, were drawn from standard normal distribution as typically done [14,22]. To evaluate the predictive accuracies of modified methods, we set different scenarios by the number of QTL (5, 50, 200 and 500) and heritability (0.1, 0.3, 0.5, and 0.8).

In simulation, genotypes and true breeding values (TBVs) were assigned to each animal from generation 1 to 6. Phenotypic records were assigned only to animals in generation 1 (experimental group), and the animals in generation 2–6 were validation groups. Finally, forty-eight combinations were obtained by different genetic architecture considering reference population size, number of QTL and heritability. Among them, 10 replicates were simulated for each scenario.

## Real dataset

The resource population was established in Ulgai, Xilingole League, Inner Mongolia of China. All the young Simmental beef cattle were born between 2008 and 2013. After weaning, Simmental cattle were moved to Beijing Jinweifuren cattle farm for fattening and put under the same feeding and management conditions. Each animal was measured for growth and developmental traits on time until its slaughter when they were 18 to 24 months of age. Live weight was measured after 24 hours of fasting. During the period of slaughter, carcass traits and meat quality traits were measured according to the Institutional Meat Purchase Specification for fresh beef guidelines. Three response variables (carcass weight, live weight and tenderloin weight) were analyzed in this study. Systematic environment factors including farm, year of measurement and age at slaughter (seasons) effects were adjusted in the mixed linear model. Genetic parameters were calculated using residual maximum likelihood method in animal model using G matrix [23].

In total, 1173 Simmental cattle were genotyped with Illumina Bovine 770K SNP BeadChip. Before statistical analysis, SNP quality control was pre-processed as following: PLINK v1.07 [24] software was used to select SNPs based on minor allele frequency ( $>0.05$ ), proportion of missing genotypes ( $<0.05$ ), Hardy-Weinberg equilibrium ( $p > 10^{-6}$ ). After quality control, any missing genotypes were replaced with the average value (on a 0–2 scale) for each SNP, and the final data consisted of 1136 Simmental cattle and 697,769 SNPs in the autosomes.

## Cross-validation procedure

To assess the predictive accuracies of modified methods in our study, we explored cross-validation methods using real data. Overall, 1136 Simmental cattle were divided into a reference and validation population. Phenotypes of the animals in the validation set were masked to be unknown. Two cross-validation methods were used to select the reference population [25]. The first method was fivefold cross-validation (random masking), in which genotyped cattle were first random divided into five groups. The whole procedure was repeated 10 times. Each

time, the data excluded one group to reference on the remaining four groups to estimated marker effects, which were used to predict GEBVs of individuals from the validation population. Therefore, four-fifth populations ( $n = 909$ ) were randomly sampled as the reference set, and the remaining one-fifth ( $n = 227$ ) of the population as the validation set. This resulted in every cattle having predicted GEBVs obtained without using its own information. The second method was to select animals based on their years of birth (cohort masking). Animals that were born before 2012 were taken as the reference population ( $n = 824$ ) and the animals born in 2012 and 2013 as the validation set ( $n = 312$ ). To evaluate the accuracy of prediction, we estimated the correlation between GEBVs and true genetic values in validation subset following previous study [26].

### Estimation of SNP effects and hyperparameters

We treated two hyperparameters as unknown and estimated them in both simulation and real data. Markov chains were run for 50,000 cycles of iterations. The first 10,000 were discarded as burn-in. In BayesB and BayesFB, 100 additional cycles of Metropolis Hastings sampling were performed for the variances of marker effects. In the modified methods, every MCMC cycle consisted of Gibbs sampling and accept-reject sampling steps. Scale parameter was sampled by the Gibbs sampling process, and degrees of freedom were acquired by efficient accept-reject scheme. A stable estimation was obtained in these sufficient iterations and little improvement could be made in higher settings. All the samples of SNP effects and the two variable hyperparameters were averaged after burn-in to obtain the estimates. In simulation,  $\pi$  was defined as the number of QTL divided by the total number of loci in BayesB, BayesFB, BayesC $\pi$  and BayesFC $\pi$ . In the real analysis,  $\pi$  was set as 0.996 for BayesB and BayesFB, and 0.8 for BayesC $\pi$  and BayesFC $\pi$ .

### Calculation of GEBVs

GEBVs for animals were calculated as the sum of all SNP effects, according to their marker genotypes. The GEBV of animals was calculated as

$$gEBV_i = \sum Z_{ij}\alpha_j \tag{17}$$

$Z_{ij}$  was a genotype for SNP  $j$  of animal  $i$ , and  $\alpha_j$  was the posterior mean of the  $j$ -th SNP effect.

## Results

### Simulation study

**Estimation of SNP effects.** To compare the difference of SNP effects estimated by the six Bayesian models, we calculated the absolute SNP effects (Fig 1). We found the absolute simulated QTL effects ranged from 0 to 0.38, when reference population size was 1000, the number of QTL was 200 and heritability was 0.5. While the absolute estimated SNP effects varied from 0 to 0.12 for BayesA, 0–0.14 for BayesFA, 0–0.30 for BayesB, 0–0.31 for BayesFB, 0–0.25 for BayesC $\pi$ , and 0–0.20 for BayesFC $\pi$ . BayesFB acquired highest absolute SNP effects value than other methods.

**Accuracies of GEBVs in generation 1–6.** To estimate the predictive accuracies of the modified methods comparing with their counterparts, we analyzed the simulation datasets with different genetic architectures. Generally, the predictive accuracies of BayesFA and BayesFC $\pi$  performed better than their counterparts in all generations. However, the predictive accuracies between BayesFB and BayesB were very similar. In generation 1 with population

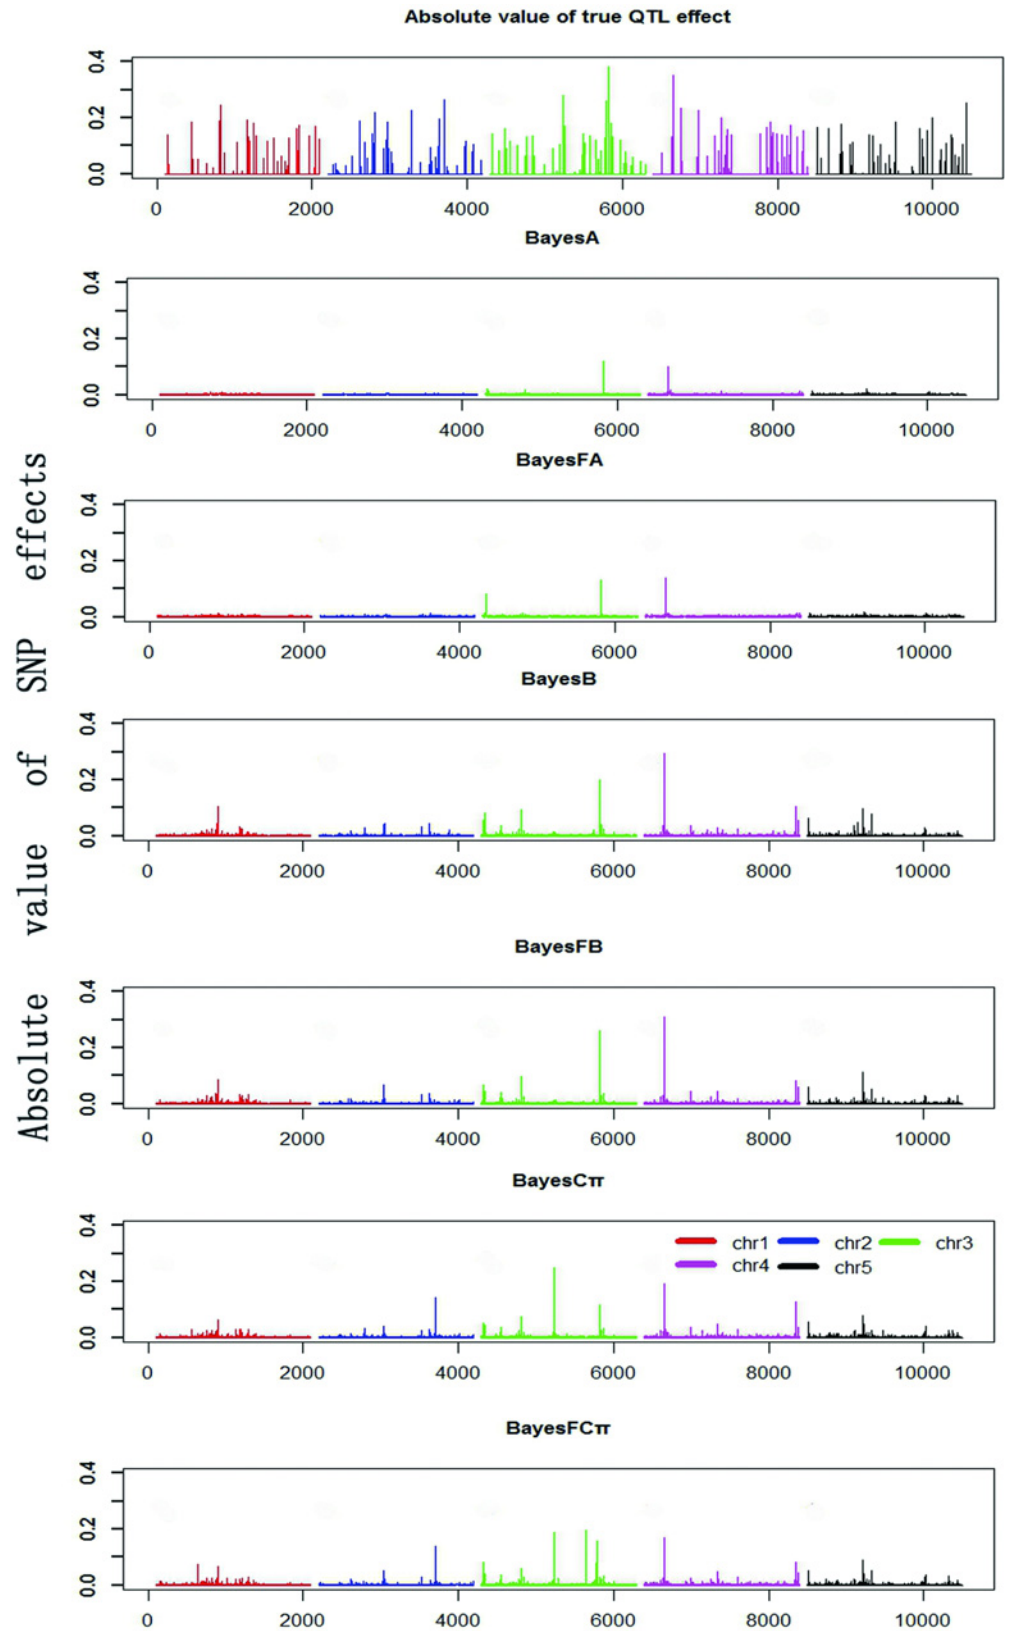



**Fig 1. Absolute value of simulated true QTL effects and SNP effects estimated using six Bayesian models from a randomly selected replication (population size = 1000, number of QTL = 200,  $h^2 = 0.5$ ).** The absolute values of the SNP effects were estimated using BayesA, BayesFA, BayesB, BayesFB, BayesCπ, and BayesFCπ, respectively.

doi:10.1371/journal.pone.0154118.g001

size of 1000, different number of QTL and heritability, the mean accuracies of GEBVs estimated by GBLUP generated the lowest accuracy (Table 1). In contrast, BayesFA and BayesFCπ improved the predictive accuracy by 0.2–2.5% and 0.2–1.5%, respectively, when compared with their counterparts. Meanwhile, in generation 2–6 with population size of 1000, QTL of 200, and heritability of 0.5, BayesFA and BayesFCπ improved the predictive accuracies by 0.6–1.7% and 0.4–1.1%, respectively (Table 2).

**Effect of heritability and QTL on prediction.** To evaluate the effects of heritability and QTL on predictive accuracy, we simulated four different heritabilities (0.1, 0.3, 0.5 and 0.8) and numbers of QTL (5, 50, 200 and 500). In Table 1, when the genetic architecture of QTL was the same, we observed the predictive accuracies dropped with a decrease in heritability. On the other hand, the predictive accuracies increased along with decreasing the number of QTLs under the same heritability. Furthermore, for a small number of QTL (QTL = 5) and low-heritability ( $h^2 = 0.1$ ), the predictive accuracies improved with the highest (2.5% and 1.5%) for BayesFA and BayesFCπ compared to their counterparts, respectively. Additionally, the predictive accuracies for high ( $h^2 = 0.8$ ) and medium ( $h^2 = 0.5$ ) heritability were not robust than those for low heritability.

**Inference on key hyperparameters.** For simulated data, QTL effects were drawn from the standard normal distribution. These were produced by the process of recombination over thousands of generations in terms of the relationships between the number of QTL and  $\nu$  or  $S_a^2$ . It was difficult to surmise the “true” value of key hyperparameters. However, we found that estimates of  $S_a^2$  were inversely related to the number of QTL for BayesFB and BayesFCπ (Fig 2). Under population size of 1000, QTL of 200 and heritability of 0.5, the estimates of  $S_a^2$  for the three modified methods were different, with posterior median at  $7e-5$ , 0.008, 0.01 and the 95% posterior interval of  $[5e-5, 1e-4]$ ,  $[0.0048, 0.012]$ ,  $[0.0073, 0.025]$  in BayesFA, BayesFB, BayesFCπ, respectively. Histograms of the posterior samples for the degrees of freedom obtained by the modified methods with population size of 1000 and heritability of 0.5 were shown in Fig 3. These values were markedly different when QTL = 200, with the posterior median at 2.6, 4.3, 118.54 and 95% posterior interval of  $[2.25, 2.9]$ ,  $[2.6, 7.2]$ ,  $[14.9, 451.9]$  in

**Table 1. Predictive accuracies of GEBVs estimated using GBLUP and six Bayesian methods in generation 1 with a population size = 1000, different number of QTL and heritability.**

| $h^2$    | QTL = 5 |       |       |       | QTL = 50 |       |       |       | QTL = 200 |       |       |       | QTL = 500 |       |       |       |
|----------|---------|-------|-------|-------|----------|-------|-------|-------|-----------|-------|-------|-------|-----------|-------|-------|-------|
|          | 0.1     | 0.3   | 0.5   | 0.8   | 0.1      | 0.3   | 0.5   | 0.8   | 0.1       | 0.3   | 0.5   | 0.8   | 0.1       | 0.3   | 0.5   | 0.8   |
| GBLUP    | 0.715   | 0.834 | 0.888 | 0.95  | 0.626    | 0.798 | 0.87  | 0.945 | 0.568     | 0.772 | 0.858 | 0.942 | 0.526     | 0.762 | 0.854 | 0.941 |
| BayesA   | 0.780   | 0.879 | 0.921 | 0.967 | 0.621    | 0.789 | 0.868 | 0.948 | 0.566     | 0.777 | 0.863 | 0.942 | 0.532     | 0.768 | 0.856 | 0.94  |
| BayesFA  | 0.805   | 0.902 | 0.937 | 0.983 | 0.637    | 0.807 | 0.877 | 0.954 | 0.579     | 0.790 | 0.871 | 0.949 | 0.549     | 0.773 | 0.858 | 0.943 |
| BayesB   | 0.766   | 0.894 | 0.923 | 0.975 | 0.631    | 0.793 | 0.883 | 0.948 | 0.565     | 0.790 | 0.865 | 0.944 | 0.554     | 0.766 | 0.855 | 0.939 |
| BayesFB  | 0.768   | 0.898 | 0.928 | 0.978 | 0.636    | 0.801 | 0.884 | 0.951 | 0.568     | 0.794 | 0.87  | 0.951 | 0.563     | 0.768 | 0.857 | 0.945 |
| BayesCπ  | 0.799   | 0.886 | 0.924 | 0.965 | 0.631    | 0.799 | 0.882 | 0.954 | 0.564     | 0.792 | 0.867 | 0.946 | 0.549     | 0.769 | 0.856 | 0.94  |
| BayesFCπ | 0.814   | 0.896 | 0.931 | 0.973 | 0.64     | 0.809 | 0.883 | 0.957 | 0.569     | 0.794 | 0.869 | 0.95  | 0.561     | 0.774 | 0.858 | 0.942 |

Values are means of predictive accuracy from 10 replicates. GBLUP, genomic best linear unbiased prediction; GEBV, genomic estimated breeding value; QTL, quantitative trait loci

doi:10.1371/journal.pone.0154118.t001

**Table 2. Predictive accuracies of GEBVs estimated using GBLUP and six Bayesian methods in generations 2–6 with a population size = 1000, QTL = 200,  $h^2 = 0.5$ .**

| Methods       | Generation 2 | Generation 3 | Generation 4 | Generation 5 | Generation 6 |
|---------------|--------------|--------------|--------------|--------------|--------------|
| GBLUP         | 0.745±0.008  | 0.711±0.011  | 0.680±0.019  | 0.633±0.028  | 0.602±0.021  |
| BayesA        | 0.754±0.013  | 0.719±0.021  | 0.689±0.015  | 0.640±0.022  | 0.605±0.011  |
| BayesFA       | 0.766±0.015  | 0.736±0.111  | 0.695±0.013  | 0.649±0.017  | 0.611±0.012  |
| BayesB        | 0.759±0.018  | 0.720±0.015  | 0.693±0.011  | 0.647±0.011  | 0.606±0.020  |
| BayesFB       | 0.767±0.012  | 0.725±0.013  | 0.696±0.015  | 0.651±0.008  | 0.610±0.014  |
| BayesC $\pi$  | 0.757±0.008  | 0.720±0.014  | 0.693±0.012  | 0.649±0.011  | 0.606±0.012  |
| BayesFC $\pi$ | 0.766±0.013  | 0.731±0.017  | 0.695±0.014  | 0.653±0.024  | 0.610±0.017  |

Values are means and standard deviations of predictive accuracy from 10 replicates.

doi:10.1371/journal.pone.0154118.t002

BayesFA, BayesFB, BayesFC $\pi$ , respectively. For the three modified methods, it was clear that the posterior median of  $\nu$  increased with the number of QTLs.

### Real dataset

Heritability estimates of three traits were 0.38, 0.43 and 0.47 for CW, LW and TW, respectively (Table 3). To assess the predictive accuracies, we applied two different cross-validation methods (random masking and cohort masking) in Simmental population. The predictive accuracies of GBLUP and Bayesian methods using the random masking method were superior to those in the cohort masking method. BayesFA showed slightly higher predictive accuracy than BayesA in the two cross-validation methods, and the accuracy improved by 0.4% to 1.2%. The predictive accuracies of BayesFB outperformed those of BayesB by 0.3% to 1%. Meanwhile, the predictive ability of BayesFC $\pi$  obviously outperformed BayesC $\pi$  with the highest increase (3.8%) of LW in cohort masking. Average posterior means of the hyperparameters estimated by modified methods across the 10 replicates were shown in Table 4. These hyperparameters were obviously different to their previous ones.

### Discussion

Genomic selection has revolutionized cattle breeding by greatly increasing the predictive accuracies of genetic merit for young animals and shortening the generation interval. In our study, we performed genomic prediction in Chinese Simmental beef cattle with addressing the impact of  $\nu$  and  $S_a^2$  on predictive accuracies. Gianola proposed that both the degrees of freedom and the scale parameters can affect the shrinkage of SNP effects [27]. To address these issues, they applied a full hierarchical approach to estimate the optimal priors instead of assigning fixed values [16,17]. Based on treating  $S_a^2$  as unknown with Gamma (1, 1) in BayesD $\pi$  [7], we further treated degree of freedom as unknown and gave an inappropriate prior distribution in BayesFA, BayesFB and BayesFC $\pi$ . To illustrate the impact of these two hyperparameters on genomic predictive accuracy, we simulated different scenarios including population sizes, numbers of QTL and heritability. Finally, cross-validation analysis using 1136 Simmental beef cattle showed that predictive ability of BayesFC $\pi$  clearly outperformed BayesC $\pi$  with the highest increase (3.8%) for live weight in the cohort masking cross-validation.

For simulation study, Yang *et al.* used antedependence model for whole genomic prediction to explore the relationship between  $S_a^2$  and linkage disequilibrium levels by simulating six different SNP marker densities [17], and found the antedependence models had significantly higher accuracies than their corresponding counterparts at higher LD level with differences

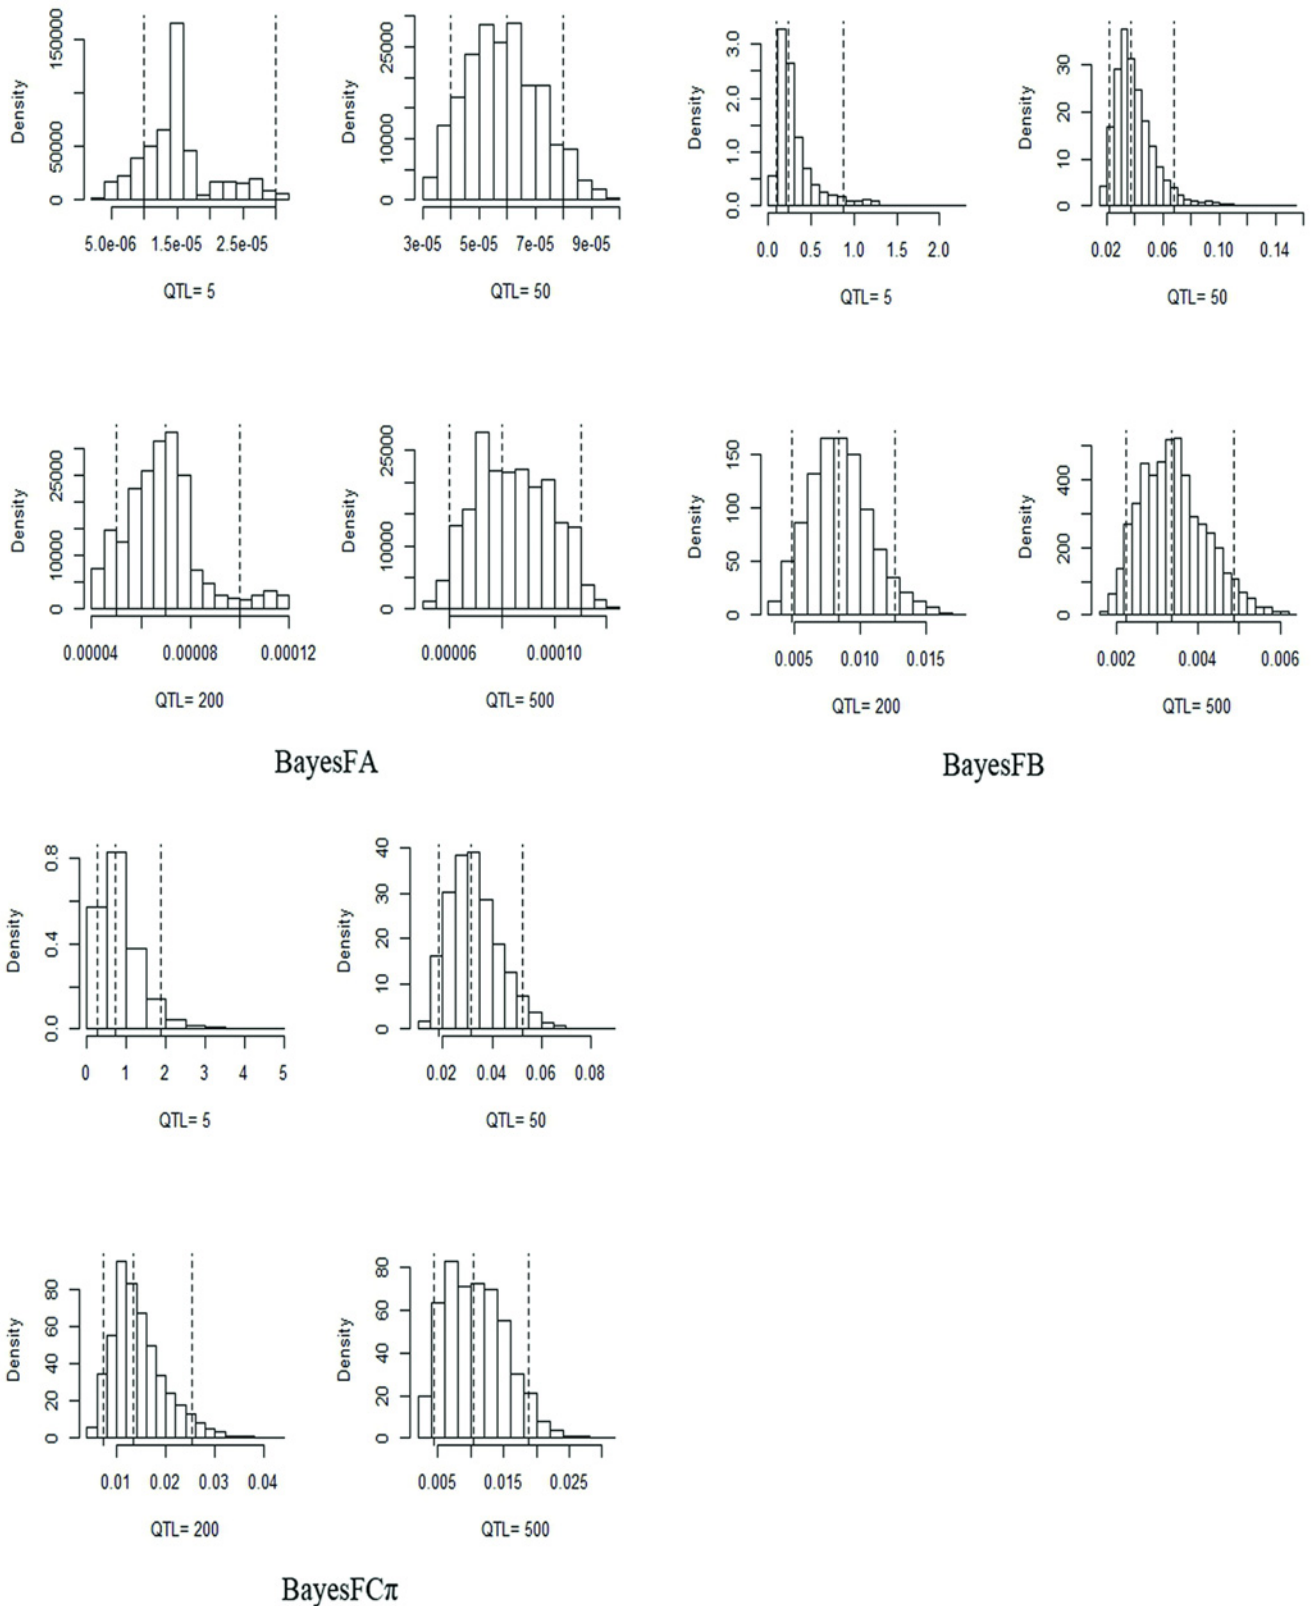

**Fig 2. Histogram of the posterior samples for the scale parameters of the  $\text{Inv-}\chi^2$  prior on variances with a population size = 1000, QTL = 5, 50, 200, 500 and  $h^2 = 0.5$  in BayesFA, BayesFB and Bayes FC $\pi$ , respectively. The dotted lines represent the posterior 5, 50 and 95% quantiles.**

doi:10.1371/journal.pone.0154118.g002

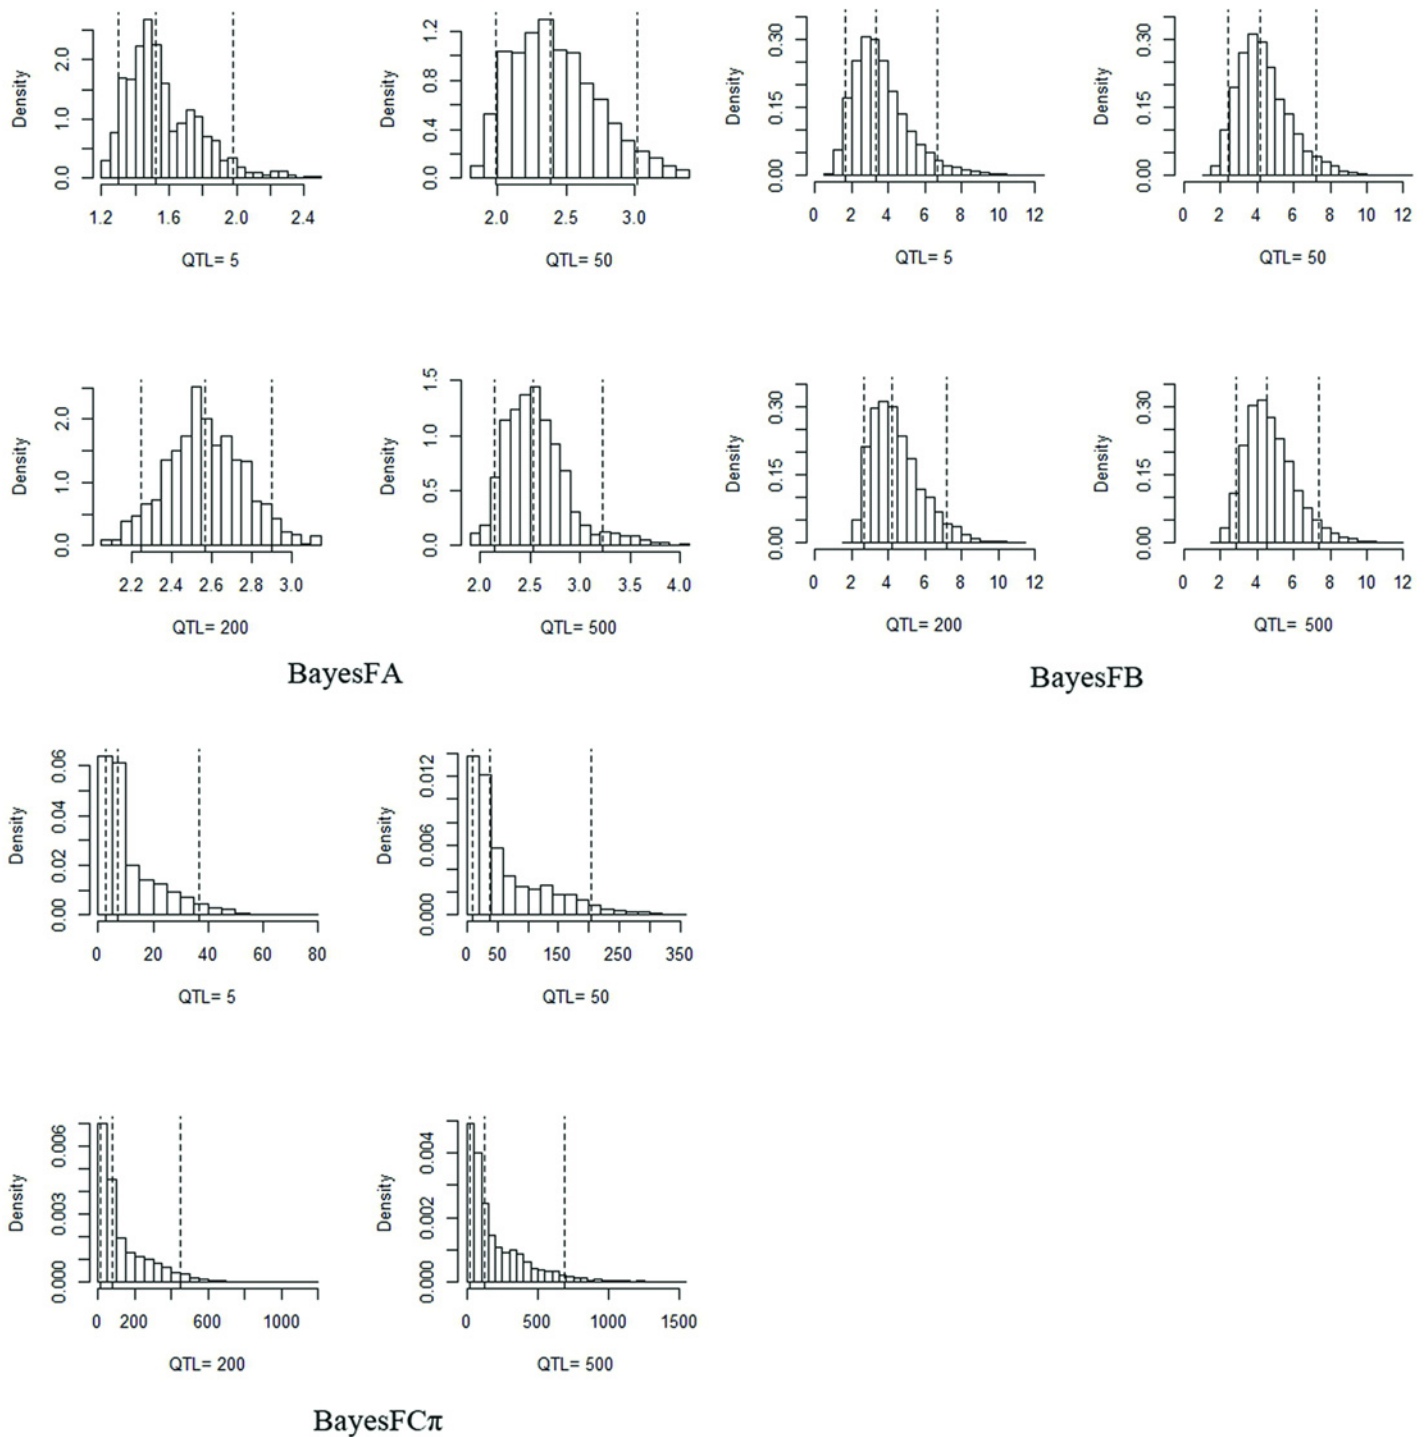

**Fig 3. Histogram of the posterior samples for the degrees of freedom of the  $Inv-\chi^2$  prior on variances with a population size = 1000, QTL = 5, 50, 200, 500 and  $h^2 = 0.5$  in BayesFA, BayesFB and BayesFC $\pi$ , respectively. The dotted lines represent the posterior 5, 50 and 95% quantiles.**

doi:10.1371/journal.pone.0154118.g003

exceeding 3%. Habier *et al.* discussed the impact of  $S_a^2$  in BayesD $\pi$ , and found it decreased with the increasing number of SNPs in their analysis [7]. In our simulation, when the population size was 1000 and  $h^2 = 0.5$ , the value decreased with the increasing number of QTL in BayesFB

**Table 3. Heritability estimation and accuracies of GEBVs estimated using GBLUP and six Bayesian methods for three traits.**

| Trait | $h^2$ | CV | GBLUP | BayesA | BayesFA | BayesB | BayesFB | BayesC $\pi$ | BayesFC $\pi$ |
|-------|-------|----|-------|--------|---------|--------|---------|--------------|---------------|
| CW    | 0.38  | RM | 0.470 | 0.486  | 0.498   | 0.487  | 0.491   | 0.483        | 0.488         |
|       |       | CM | 0.413 | 0.413  | 0.422   | 0.411  | 0.414   | 0.402        | 0.409         |
| LW    | 0.43  | RM | 0.526 | 0.576  | 0.582   | 0.594  | 0.602   | 0.598        | 0.596         |
|       |       | CM | 0.468 | 0.474  | 0.478   | 0.460  | 0.470   | 0.412        | 0.450         |
| TW    | 0.47  | RM | 0.540 | 0.560  | 0.570   | 0.566  | 0.569   | 0.561        | 0.569         |
|       |       | CM | 0.474 | 0.467  | 0.474   | 0.478  | 0.485   | 0.475        | 0.483         |

RM, Random masking is the first way to mask phenotypes using fivefold cross-validation, and CM, Cohort masking is the second way to mask phenotypes by their birth year. Values are the means of 10 repeats for RM method. Accuracy is evaluated using  $\hat{\rho}_{gg} = \frac{\overline{EBV_{GEBV}}}{\sqrt{h^2 \sigma_p^2 + \sigma_{GEBV}^2}}$ .  $EBV$ , estimated breeding values.  $\sigma_p^2$  is the phenotypic variance estimated from the primary analysis using all genotyped animals in the reference population.  $GEBV$ , genomic estimated breeding value; GBLUP, genomic best linear unbiased prediction; CW, carcass weight; LW, live weight; TW, tenderloin weight.

doi:10.1371/journal.pone.0154118.t003

and BayesFC $\pi$  as shown in Fig 2. For degrees of freedom, Jia *et al.* developed a full hierarchical approach to estimate  $\nu$  [28] and found optimal marker-effect variance depended on the genetic architecture of the trait. We assumed inappropriate priors for  $\nu$  in BayesFA and BayesFC $\pi$  with exponential distribution, and BayesFB with gamma distribution. The larger degrees of freedom sampled by efficient accept-reject can result in greater impact on the posterior SNP variances inference. The posterior median degrees of freedom estimated by BayesFA, BayesFB and BayesFC $\pi$  were 2.6, 4.3, 118.54, respectively, but different from the fixed value 4.2 as suggested by Meuwissen *et al.* [14]. Therefore, a large value for the degrees of freedom may not indicate better prediction. In this study, BayesFA estimated smaller degrees of freedom (2.6) than in BayesA (4.2), while BayesFA show higher predictive accuracy than in BayesA.

For real dataset, Simmental beef cattle was partitioned into training and validation data sets, cross-validation analyses were carried out using CW, LW and TW traits to assess the accuracies of genomic prediction. Previous studies have conducted genomic selection of CW and LW traits in other Simmental cattle [29–31]. We found the estimated heritability of CW (0.38) in our study was slightly lower than Mahdi Saatchi’s study (0.4) [30]. In Table 3, BayesFA and BayesFB showed higher accuracy of GEBVs than their counterparts for all traits using the two cross-validation methods. BayesFC $\pi$  increased the accuracy as compared with BayesC $\pi$  in three traits except for LV in random masking method. The degrees of freedom and scale parameters in the modified methods were treated in inappropriate priors to be estimated from the data, which have significant impacts of locus-specific variances elaborated by Habier *et al.* [7]. Therefore, the predictive accuracies of these modified methods were superior to their conventional counterparts. Using high density SNP chip, we found BayesA performs markedly

**Table 4. Average posterior means of the hyperparameters ( $\nu, S_a^2$ ) based on BayesFA, BayesFB and Bayes FC $\pi$  analyses for three traits.**

| Methods        | Hyperparameters | CW                 | LW                 | TW               |
|----------------|-----------------|--------------------|--------------------|------------------|
| BayesFA        | $\nu$           | 4.08(0.21)         | 4.88(0.21)         | 5.17(0.13)       |
|                | $S_a^2$         | 1.66 e-3 (1.4 e-4) | 6.87 e-4 (2.6 e-5) | 6.52e-6(8.12e-7) |
| BayesFB        | $\nu$           | 4.92(0.28)         | 4.04(0.16)         | 4.80(0.17)       |
|                | $S_a^2$         | 0.869(0.026)       | 0.372(0.016)       | 9.02e-5(8.12e-6) |
| Bayes FC $\pi$ | $\nu$           | 11.35(1.02)        | 8.43(0.85)         | 12.53(1.06)      |
|                | $S_a^2$         | 0.179(0.014)       | 1.762(0.105)       | 0.081(0.003)     |

Empirical standard deviations across 10 replicates are provided in parentheses.

doi:10.1371/journal.pone.0154118.t004

better than other conventional methods (BayesB and BayesC $\pi$ ) for LW in cohort masking cross-validation method despite the statistical drawback of BayesA as described by Gianola *et al.* [8].

The proposal distribution of locus-specific variance is an inverse chi-square distribution with parameters  $\nu$  and  $S_a^2$ . In each iteration, the modified methods sampled new degrees of freedom and scale parameters. These variable hyperparameters could influence the sampling of variances of SNP effects, which may induce higher predictive accuracies than their conventional counterparts. Two hyperparameters estimated in our study were different from Yang *et al.* [17]. Their estimates of the degrees of freedom were extremely large ( $>15$ ) for anteBayesA and anteBayesB methods with heterogeneous stock mice data. These differences may be caused by different prior assumption, sampling algorithm and dataset. In contrast, our study showed larger values for the degrees of freedom only in BayesFC $\pi$ .

Due to the additional sampling the variable  $\nu$  and  $S_a^2$  in each iteration, the computing time in our methods was longer than their counterparts, respectively, *i.e.*, with population size of 1000, QTL = 200,  $h^2 = 0.5$  using 3.3GHz, Intel core(TM) i3-2120 processor, computing time for 50000 iterations was 2.39, 2.56, 5.08, 5.36, 2.12 and 2.29 hr for BayesA, BayesFA, BayesB, BayesFB, BayesC $\pi$  and BayesFC $\pi$ , respectively. However, these modified methods produced higher predictive accuracies than their conventional counterparts. For the posterior distribution in a complicated non-standard form, the degrees of freedom sampled by the efficient accept-reject algorithm may produce anticipated results.

In conclusion, we performed genomic prediction for live weight, carcass weight and tenderloin weight in Chinese Simmental beef cattle. Our study indicated the degrees of freedom and scale parameters could slightly impact the predictive accuracies in both simulation and real dataset.

## Acknowledgments

This study was supported by Cattle Breeding Innovative Research Team (cxgc-ias-03), the 12th "Five-Year" National Science and Technology Support Project (2011BAD28B04) Basic Research Fund Program, the National High Technology Research and Development Program of China (863 Program 2013AA102505-4), Chinese Academy of Agricultural Sciences Fundamental Research Budget Increment Projects (2013ZL031 and 2014ZL006), Chinese Academy of Agricultural Sciences Foundation (2014ywf-yb-4), Beijing Natural Science Foundation (6154032), and the National Natural Science Foundations of China (31472079, 31372294, and 31402039).

## Author Contributions

Conceived and designed the experiments: JYL. Performed the experiments: BZ. Analyzed the data: BZ MZ. Contributed reagents/materials/analysis tools: JCJ HN YHW YW YC LPZ XG HJG JFL. Wrote the paper: BZ LYX.

## References

1. Hayes BJ, Bowman PJ, Chamberlain AJ, Goddard ME. Invited review: Genomic selection in dairy cattle: progress and challenges. *J Dairy Sci.* 2009; 92(2):433–43. Epub 2009/01/24. doi: [10.3168/jds.2008-1646](https://doi.org/10.3168/jds.2008-1646) PMID: [19164653](https://pubmed.ncbi.nlm.nih.gov/19164653/).
2. Heffner EL, Sorrells ME, Jannink J-L. Genomic Selection for Crop Improvement. *Crop Science.* 2009; 49(1):1. doi: [10.2135/cropsci2008.08.0512](https://doi.org/10.2135/cropsci2008.08.0512)
3. Lorenz AJ, Chao S, Asoro FG, Heffner EL, Hayashi T, Iwata H, et al. Chapter Two—Genomic Selection in Plant Breeding: Knowledge and Prospects. In: Donald LS, editor. *Advances in Agronomy.* Volume 110: Academic Press; 2011. p. 77–123.

4. de Los Campos G, Hickey JM, Pong-Wong R, Daetwyler HD, Calus MP. Whole-genome regression and prediction methods applied to plant and animal breeding. *Genetics*. 2013; 193(2):327–45. Epub 2012/06/30. doi: [10.1534/genetics.112.143313](https://doi.org/10.1534/genetics.112.143313) PMID: [22745228](https://pubmed.ncbi.nlm.nih.gov/22745228/); PubMed Central PMCID: PMC3567727.
5. Spelman RJ, Hayes BJ, Berry DP. Use of molecular technologies for the advancement of animal breeding: genomic selection in dairy cattle populations in Australia, Ireland and New Zealand. *Animal Production Science*. 2013; 53, 869–875. doi: [10.1071/an12304](https://doi.org/10.1071/an12304)
6. Verbyla KL, Hayes BJ, Bowman PJ, Goddard ME. Accuracy of genomic selection using stochastic search variable selection in Australian Holstein Friesian dairy cattle. *Genetics research*. 2009; 91(5):307–11. Epub 2009/11/20. doi: [10.1017/S0016672309990243](https://doi.org/10.1017/S0016672309990243) PMID: [19922694](https://pubmed.ncbi.nlm.nih.gov/19922694/).
7. Habier D, Fernando RL, Kizilkaya K, Garrick DJ. Extension of the bayesian alphabet for genomic selection. *BMC bioinformatics*. 2011; 12:186. Epub 2011/05/25. doi: [10.1186/1471-2105-12-186](https://doi.org/10.1186/1471-2105-12-186) PMID: [21605355](https://pubmed.ncbi.nlm.nih.gov/21605355/); PubMed Central PMCID: PMC3144464.
8. Gianola D, de los Campos G, Hill WG, Manfredi E, Fernando R. Additive genetic variability and the Bayesian alphabet. *Genetics*. 2009; 183(1):347–63. Epub 2009/07/22. doi: [10.1534/genetics.109.103952](https://doi.org/10.1534/genetics.109.103952) PMID: [19620397](https://pubmed.ncbi.nlm.nih.gov/19620397/); PubMed Central PMCID: PMC2746159.
9. Park T, Casella G. The Bayesian Lasso. *J Am Stat Assoc*. 2008; 103(482):681–6. doi: [10.1198/016214508000000337](https://doi.org/10.1198/016214508000000337)
10. de Los Campos G, Gianola D, Rosa GJ. Reproducing kernel Hilbert spaces regression: a general framework for genetic evaluation. *J Anim Sci*. 2009; 87(6):1883–7. Epub 2009/02/14. doi: [10.2527/jas.2008-1259](https://doi.org/10.2527/jas.2008-1259) PMID: [19213705](https://pubmed.ncbi.nlm.nih.gov/19213705/).
11. de los Campos G, Naya H, Gianola D, Crossa J, Legarra A, Manfredi E, et al. Predicting quantitative traits with regression models for dense molecular markers and pedigree. *Genetics*. 2009; 182(1):375–85. Epub 2009/03/19. doi: [10.1534/genetics.109.101501](https://doi.org/10.1534/genetics.109.101501) PMID: [19293140](https://pubmed.ncbi.nlm.nih.gov/19293140/); PubMed Central PMCID: PMC2674834.
12. Brondum RF, Su G, Lund MS, Bowman PJ, Goddard ME, Hayes BJ. Genome position specific priors for genomic prediction. *BMC genomics*. 2012; 13:543. Epub 2012/10/12. doi: [10.1186/1471-2164-13-543](https://doi.org/10.1186/1471-2164-13-543) PMID: [23050763](https://pubmed.ncbi.nlm.nih.gov/23050763/); PubMed Central PMCID: PMC3534589.
13. Wang CL, Ding XD, Wang JY, Liu JF, Fu WX, Zhang Z, et al. Bayesian methods for estimating GEBVs of threshold traits. *Heredity*. 2013; 110(3):213–9. Epub 2012/11/15. doi: [10.1038/hdy.2012.65](https://doi.org/10.1038/hdy.2012.65) PMID: [23149458](https://pubmed.ncbi.nlm.nih.gov/23149458/); PubMed Central PMCID: PMC3668646.
14. Meuwissen TH, Hayes BJ, Goddard ME. Prediction of total genetic value using genome-wide dense marker maps. *Genetics*. 2001; 157(4):1819–29. Epub 2001/04/06. PMID: [11290733](https://pubmed.ncbi.nlm.nih.gov/11290733/); PubMed Central PMCID: PMC1461589.
15. Fernando RL, Habier D, Stricker C, Dekkers JCM, Totir LR. Genomic selection. *Acta Agric Scand A Anim Sci*. 2007; 57(4):192–5. doi: [10.1080/09064700801959395](https://doi.org/10.1080/09064700801959395)
16. Yi N, Xu S. Bayesian LASSO for quantitative trait loci mapping. *Genetics*. 2008; 179(2):1045–55. doi: [10.1534/genetics.107.085589](https://doi.org/10.1534/genetics.107.085589) PMID: [18505874](https://pubmed.ncbi.nlm.nih.gov/18505874/); PubMed Central PMCID: PMC2429858.
17. Yang W, Tempelman RJ. A Bayesian antedependence model for whole genome prediction. *Genetics*. 2012; 190(4):1491–501. doi: [10.1534/genetics.111.131540](https://doi.org/10.1534/genetics.111.131540) PMID: [22135352](https://pubmed.ncbi.nlm.nih.gov/22135352/); PubMed Central PMCID: PMC3316658.
18. Yang W, Chen C, Tempelman RJ. Improving the computational efficiency of fully Bayes inference and assessing the effect of misspecification of hyperparameters in whole-genome prediction models. *Genet Sel Evol*. 2015; 47:13. doi: [10.1186/s12711-015-0092-x](https://doi.org/10.1186/s12711-015-0092-x) PMID: [25885894](https://pubmed.ncbi.nlm.nih.gov/25885894/); PubMed Central PMCID: PMC4351701.
19. Geweke J. Priors for macroeconomics time series and their application. Institute for Empirical Macroeconomics Discussion Paper. N0.641992.
20. Geweke J. Bayesian treatment of the independent student-t linear model. *Journal of Applied Electrochemistry*. 1993; 8(S1):S19–S40.
21. Latushkin Y, Randolph T, and Schnaubelt R. Exponential Dichotomy and Mild Solutions of Nonautonomous Equations in Banach Spaces. *Dynam Diff Eq* 1998; 10, 489–510.
22. Meuwissen T, Goddard M. Accurate prediction of genetic values for complex traits by whole-genome resequencing. *Genetics*. 2010; 185(2):623–31. doi: [10.1534/genetics.110.116590](https://doi.org/10.1534/genetics.110.116590) PMID: [20308278](https://pubmed.ncbi.nlm.nih.gov/20308278/); PubMed Central PMCID: PMC2881142.
23. VanRaden PM. Efficient methods to compute genomic predictions. *J Dairy Sci*. 2008; 91(11):4414–23. Epub 2008/10/24. doi: [10.3168/jds.2007-0980](https://doi.org/10.3168/jds.2007-0980) PMID: [18946147](https://pubmed.ncbi.nlm.nih.gov/18946147/).
24. Purcell S, Neale B, Todd-Brown K, Thomas L, Ferreira MA, Bender D, et al. PLINK: a tool set for whole-genome association and population-based linkage analyses. *Am J Hum Genet*. 2007; 81(3):559–75. doi: [10.1086/519795](https://doi.org/10.1086/519795) PMID: [17701901](https://pubmed.ncbi.nlm.nih.gov/17701901/); PubMed Central PMCID: PMC1950838.

25. Luan T, Woolliams JA, Lien S, Kent M, Svendsen M, Meuwissen TH. The accuracy of Genomic Selection in Norwegian red cattle assessed by cross-validation. *Genetics*. 2009; 183(3):1119–26. doi: [10.1534/genetics.109.107391](https://doi.org/10.1534/genetics.109.107391) PMID: [19704013](https://pubmed.ncbi.nlm.nih.gov/19704013/); PubMed Central PMCID: PMC2778964.
26. Saatchi M, McClure MC, McKay SD, Rolf MM, Kim J, Decker JE, et al. Accuracies of genomic breeding values in American Angus beef cattle using K-means clustering for cross-validation. *Genet Sel Evol*. 2011; 43:40. doi: [10.1186/1297-9686-43-40](https://doi.org/10.1186/1297-9686-43-40) PMID: [22122853](https://pubmed.ncbi.nlm.nih.gov/22122853/); PubMed Central PMCID: PMC3250932.
27. Gianola D. Priors in whole-genome regression: the bayesian alphabet returns. *Genetics*. 2013; 194(3):573–96. Epub 2013/05/03. doi: [10.1534/genetics.113.151753](https://doi.org/10.1534/genetics.113.151753) PMID: [23636739](https://pubmed.ncbi.nlm.nih.gov/23636739/); PubMed Central PMCID: PMC3697965.
28. Jia Y, Jannink JL. Multiple-trait genomic selection methods increase genetic value prediction accuracy. *Genetics*. 2012; 192(4):1513–22. doi: [10.1534/genetics.112.144246](https://doi.org/10.1534/genetics.112.144246) PMID: [23086217](https://pubmed.ncbi.nlm.nih.gov/23086217/); PubMed Central PMCID: PMC3512156.
29. Crews DH Jr, Pollak EJ, Quaas RL. Evaluation of Simmental carcass EPD estimated using live and carcass data. *J Anim Sci*. 2004; 82:661–7. PMID: [15032422](https://pubmed.ncbi.nlm.nih.gov/15032422/)
30. Saatchi M, Schnabel RD, Rolf MM, Taylor JF, Garrick DJ. Accuracy of direct genomic breeding values for nationally evaluated traits in US Limousin and Simmental beef cattle. *Genet Sel Evol*. 2012; 44:38. doi: [10.1186/1297-9686-44-38](https://doi.org/10.1186/1297-9686-44-38) PMID: [23216608](https://pubmed.ncbi.nlm.nih.gov/23216608/); PubMed Central PMCID: PMC3536607.
31. Pintus MA, Gaspa G, Nicolazzi EL, Vicario D, Rossoni A, Ajmone-Marsan P, et al. Prediction of genomic breeding values for dairy traits in Italian Brown and Simmental bulls using a principal component approach. *J Dairy Sci*. 2012; 95(6):3390–400. doi: [10.3168/jds.2011-4274](https://doi.org/10.3168/jds.2011-4274) PMID: [22612973](https://pubmed.ncbi.nlm.nih.gov/22612973/).
